# Supplementary material
Source: PubMed Central journal article supplement (PMC2628575)
Supplement: NIHMS82303-supplement-supp2.pdf [file NIHMS82303-supplement-supp2.pdf]

| Stimulation                    | Normalized to Actin |           | Normalized to HPRT |           |
|--------------------------------|---------------------|-----------|--------------------|-----------|
|                                | PMA                 | nil       | PMA                | nil       |
| <i>CD40L</i>                   | 0.003901            | 0.0005233 | 0.7071068          | 0.2431637 |
| <i>CD69</i>                    | 0.0033076           | 0.000309  | 0.5987394          | 0.1435873 |
| <i>IFN <math>\gamma</math></i> | 0.5                 | 0.05995   | 90.509668          | 27.857618 |
| <i>IL-2</i>                    | 0.69737             | 0.0003312 | 126.23779          | 0.1538931 |
| <i>IL-5</i>                    | 0.1626677           | 0.0046453 | 29.446005          | 2.1584565 |
| <i>IL-13</i>                   | 0.0029604           | 1.27E-06  | 0.5358867          | 0.0005888 |
