# Supplementary material
Source: PubMed Central journal article supplement (PMC2628575)
Supplement: NIHMS82303-supplement-supp_1.pdf [file NIHMS82303-supplement-supp_1.pdf]

| <i>Classification</i> | <i>Gene</i> | <i>Product<br/>(bp)</i> | <i>Forward</i>          | <i>Reverse</i>        |
|-----------------------|-------------|-------------------------|-------------------------|-----------------------|
| Activation            | CD69        | 166                     | ccccatttctcaacacgtca    | catggctgtctgatggcatt  |
| Activation            | CD40L       | 209                     | gccagtttgaaggctttgtg    | cccattttccagggttacca  |
| Cytokine              | IFNG        | 121                     | aggcattttgaagaattggaaag | cacactcttttgatgctctgg |
| Cytokine              | IL2         | 107                     | caaactcaccaggatgctcac   | gcacttcctccagaggttga  |
| Cytokine              | IL5         | 196                     | gcaagggggtactgtggaaa    | ctttggctgcaacaaccag   |
| Cytokine              | IL13        | 185                     | ctgcaatggcagcatggtat    | ttttggtgtctcggacatgc  |
| Housekeeping          | HPRT1       | 209                     | gacccacgaagtgttgat      | ggcgatgtcaataggactcca |

**Table I. Primer pairs used for quantitative PCR**
